# Supplementary material for: Cation and anion optimization of ammonium halide for interfacial passivation of inverted perovskite solar cells
Source: Royal Society of Chemistry journal article supplement (doi:10.1039/d3cc01195j), 2023-01-01
Supplement: d3cc01195j1.pdf [file d3cc01195j1.pdf]

## Electronic Supporting Information

### **Cation and anion optimization of ammonium halide for interfacial passivation of inverted perovskite solar cells**

*Hao Wu<sup>†</sup>, Xinxing Yin<sup>†\*</sup>, Lei Lu, Jiaying Song, Lin Hu, Yingzhi Jin, Zhen Su, Jiefeng Hai\* and Zaifang Li\**

Hao Wu, Dr. Xinxing Yin, Dr. Jiaying Song, Dr. Lin Hu, Dr. Yingzhi Jin, Dr. Zhen Su, Prof. Zaifang Li

China-Australia Institute for Advanced Materials and Manufacturing (IAMM),  
Jiaying University, Jiaying 314001, China.

E-mails: xxyin@zjxu.edu.cn; zaifang.li@zjxu.edu.cn

Hao Wu, Associate professor Jiefeng Hai

Guangxi Key Laboratory of Electrochemical and Magneto-chemical Functional  
Materials, Guilin University of Technology, Guilin, 541004, China

E-mail: haijiefeng@glut.edu.cn

Dr. Xinxing Yin

Zhejiang Jinko Solar, Yuanhua Town, Haining, Zhejiang 314416, China.

Engineering Research Center of Alternative Energy Materials & Devices, Ministry of  
Education, Sichuan University, Chengdu 610065, China.

Dr. Lei Lu

College of Biological, Chemical Science and Chemical Engineering, Jiaying  
University, Jiaying 314001, China.

<sup>†</sup> H. W. and X. Y. contributed equally to this work.

### **Contents**

|                                                                           |     |
|---------------------------------------------------------------------------|-----|
| 1. Experimental Section.....                                              | S2  |
| 2. Synthesis.....                                                         | S3  |
| 3. Device fabrication.....                                                | S5  |
| 4. <sup>1</sup> H NMR, <sup>13</sup> C NMR, and MALDI-TOF MS spectra..... | S5  |
| 5. DFT<br>simulation.....                                                 | S7  |
| 6. Material Test.....                                                     | S7  |
| 7. Device Test.....                                                       | S8  |
| 8. Concentration Optimization.....                                        | S11 |

## 1. Experimental section

The  $^1\text{H}$  NMR spectra were collected on a Bruker AVANCE III HD 400 MHz spectrometer in  $d_6$ -DMSO solution with TMS as a reference. The morphology of the samples was recorded by scanning electron microscopy (SEM, Germany ZEISS Sigma 300). Steady-state photoluminescence (PL) and time-resolved photoluminescence spectrum (TRPL) spectrum were conducted with FLS1000 spectrofluorometer (Edinburgh) with a pulsed excitation laser of 375 nm. UV-Vis absorption spectra were collected on a UV-Vis spectrometer (PerkinElmer model Lambda 365). X-ray photoelectron spectrometer (ThermoFischer, ESCALAB Xi+, USA) was used for testing. Among them, the analysis room is  $8 \times 10^{-10}$  Pa, the excitation source is, Al ka ray (emission  $h\nu = 1486.6$  eV), the working voltage is 12.5 kV, the filament current is 16 mA, and the signal is accumulated according to the condition of the sample. The full spectrum of the Passing-Energy test is 100eV, the narrow spectrum is 20eV, the step size is 0.05eV, the dwell time is 40-50 ms, and the charging is performed with the binding energy of C1s = 284.80 eV as the energy standard. Correction. X-ray diffraction (XRD) characterization was Equipment Model (Nippon Rigaku Ultima IV). The samples were deposited on ITO glass with the same solution compositions as those for the solar cells.  $J$ - $V$  characteristics were measured in  $\text{N}_2$ -filled glove box by Vigor source meter under simulated sunlight from a solar simulator (Enlitech, SS-F5, Taiwan). EQEs were collected by an EnLiTechnology (Taiwan) EQE measurement system. A National Renewable Energy Laboratory calibrated silicon solar cell was used to obtain the AM 1.5G solar simulator's light intensity. The devices were shielded with a shading mask with an aperture area of  $0.043 \text{ cm}^2$ .

## 2. Synthesis

Commercially available reagents and solvents were purchased from Energy or Admas and used without further purification.

### Synthesis of PNEAI

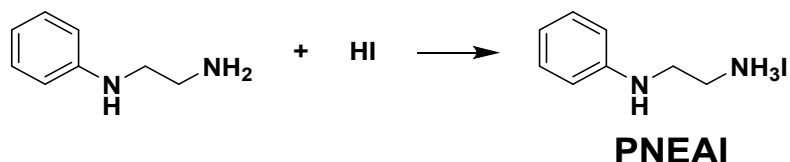

**Scheme S1.** Synthetic route of PNEAI

### PNEAI

HI (2.56 g, 55%, 11.01 mmol) was added dropwise to a solution of *N*<sup>1</sup>-phenylethane-1,2-diamine (1.5 g, 11.01 mmol) in ethanol at 0 °C under a nitrogen atmosphere. After being stirred at room temperature for 2 h, the mixture was concentrated in vacuo. The precipitate was washed with petroleum ether and recrystallized in diethyl ether three times. The product was collected and dried under a high vacuum overnight, providing the pure **PNEAI** (2.45 g, 84%) as a white solid powder. <sup>1</sup>H NMR (600 MHz, DMSO-*d*<sub>6</sub>) δ 7.72 (s, 3H), 7.12 (t, *J* = 7.8 Hz, 2H), 6.60 (dd, *J* = 12.1, 7.5 Hz, 3H), 5.68 (t, *J* = 6.1 Hz, 1H), 3.26 (d, *J* = 7.1 Hz, 2H), 2.97 (t, *J* = 6.4 Hz, 2H).

### Synthesis of PNEABr

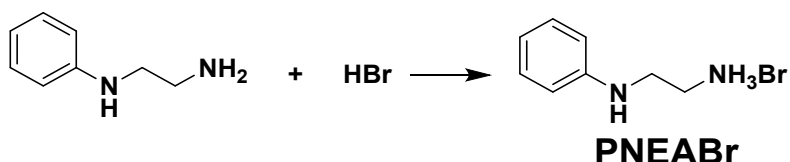

**Scheme S2.** Synthetic route of PNEABr

### PNEABr

HBr (1.86 g, 48%, 11.01 mmol) was added dropwise to a solution of *N*<sup>1</sup>-phenylethane-1,2-diamine (1.5 g, 11.01 mmol) in ethanol at 0 °C under a nitrogen atmosphere. After being stirred at room temperature for 2 h, the mixture was concentrated in vacuo. The precipitate was washed with petroleum ether and recrystallized in diethyl ether three times. The product was collected and dried under a high vacuum overnight, providing the pure **PNEABr** (1.80g, 75%) as a white solid powder. <sup>1</sup>H NMR (600 MHz, DMSO-*d*<sub>6</sub>) δ 7.91 (d, *J* = 18.2 Hz, 3H), 7.11 (t, *J* = 7.6 Hz, 2H), 6.61 (dd, *J* = 16.1, 6.9 Hz, 3H), 5.78 (d, *J* = 8.1 Hz, 1H), 3.29 (q, *J* = 6.1 Hz, 2H), 2.97 (t, *J* = 6.4 Hz, 2H).

### Synthesis of PNEACl

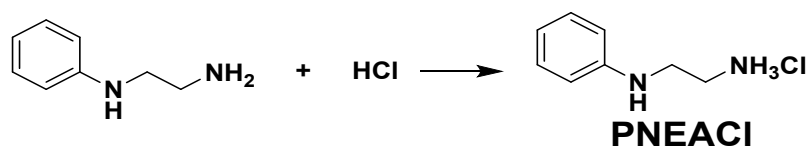

**Scheme S3.** Synthetic route of PNEACl

### PNEACl

HCl (1.49 g, 36%, 14.68 mmol) was added dropwise to a solution of *N*<sup>1</sup>-phenylethane-1,2-diamine (2 g, 14.68 mmol) in ethanol at 0 °C under a nitrogen atmosphere. After being stirred at room temperature for 2 h, the mixture was concentrated in vacuo. The precipitate was washed with petroleum ether and recrystallized in diethyl ether three times. The product was collected and dried under a high vacuum overnight, providing the pure **PNEACl** (2.10 g, 83%) as a white solid powder. <sup>1</sup>H NMR (600 MHz, DMSO-*d*<sub>6</sub>) δ 8.15 (m, 3H), 7.11 (t, *J* = 7.6 Hz, 2H), 6.60 (dd, *J* = 22.2, 7.6 Hz, 3H), 6.02 – 5.78 (m, 1H), 3.29 (dt, *J* = 7.7, 3.8 Hz, 2H), 2.95 (t, *J* = 6.4 Hz, 2H).

### 3. Device fabrication:

ITO glass ( $15 \Omega \text{ sq}^{-1}$ ) was ultrasonically cleaned with deionized water, acetone, and isopropanol for 15 minutes, respectively. Then, the cleaned ITO substrate was treated with ultraviolet ozone for 6 minutes. PTAA (2 mg/mL solution in toluene) was spin-coated on clean ITO at 6000 rpm for 30 s and then annealed at  $100^\circ\text{C}$  for 10 min. The ITO substrates were cooled to room temperature before use. 1M perovskite precursor solutions were constructed by mixing FAI,  $\text{PbI}_2$ , CsI, and  $\text{PbBr}_2$  in DMF:DMSO mixed solvent (4:1; v/v) with a chemical formula of  $\text{FA}_{0.83}\text{Cs}_{0.17}\text{Pb}(\text{I}_{0.86}\text{Br}_{0.14})_3$ . 45  $\mu\text{L}$  of the prepared precursor solution was spin-coated at 1000 rpm for 10 s and 5000 rpm for 30 s onto the PTAA-coated ITO substrate, 150  $\mu\text{L}$  CB as anti-solvent was dripped on the film at 15 s before the end of the last procedure, and then annealed at  $100^\circ\text{C}$  for 10 min. After deposition of the perovskite active layer, 35  $\mu\text{L}$  of PNEACl (1mg/mL, IPA), PNEABr (0.5mg/mL, IPA), or PNEAI (0.5mg/mL, IPA) solution was spin-coated on to the film at 4000 rpm for 30 s. Finally, 15 nm C60, 5 nm BCP and 80 nm silver electrode was evaporated under a high vacuum ( $< 6 \times 10^{-4}$  Torr) sequentially. The active area for all solar cells was  $0.04 \text{ cm}^2$ , defined by the shadow mask.

### 4. $^1\text{H}$ NMR spectra

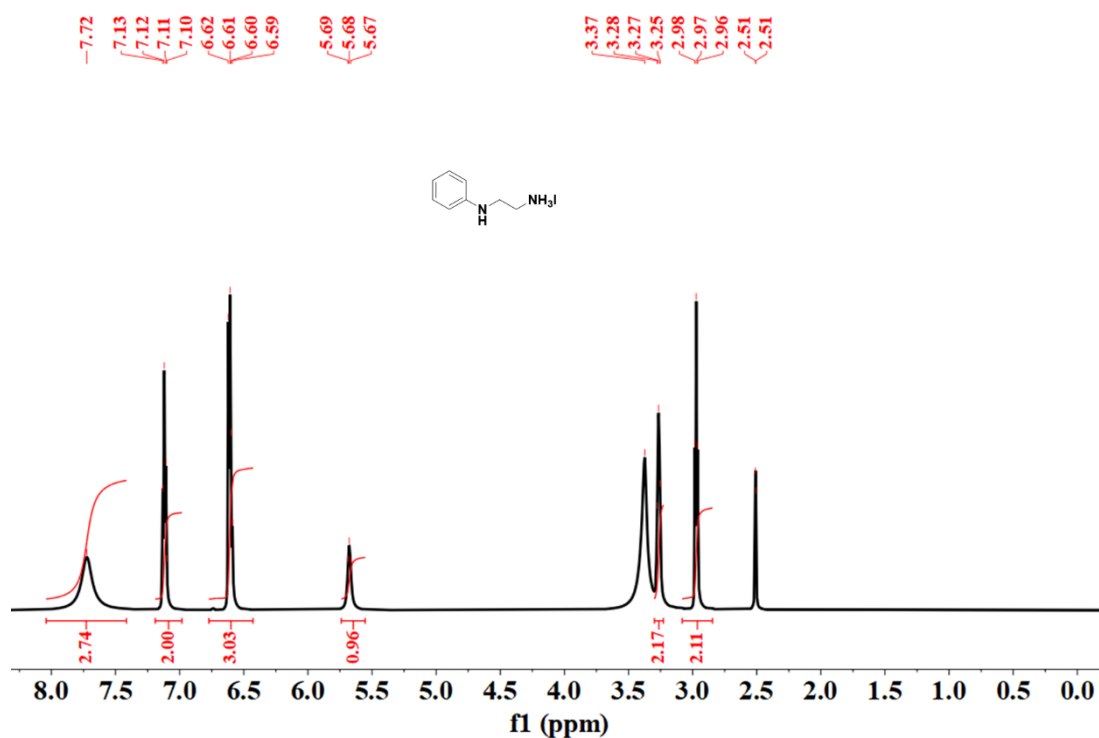

Figure S1.  $^1\text{H}$  NMR spectrum of compound PNEAI.

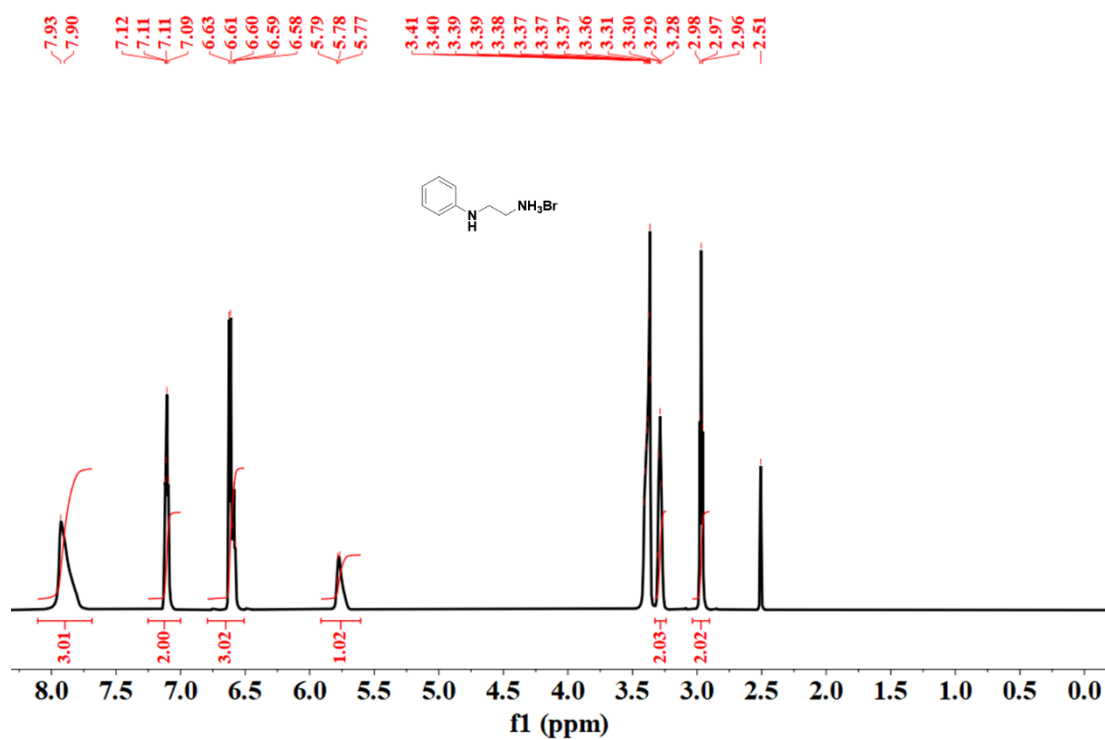

Figure S2. <sup>1</sup>H NMR spectrum of compound PNEABr.

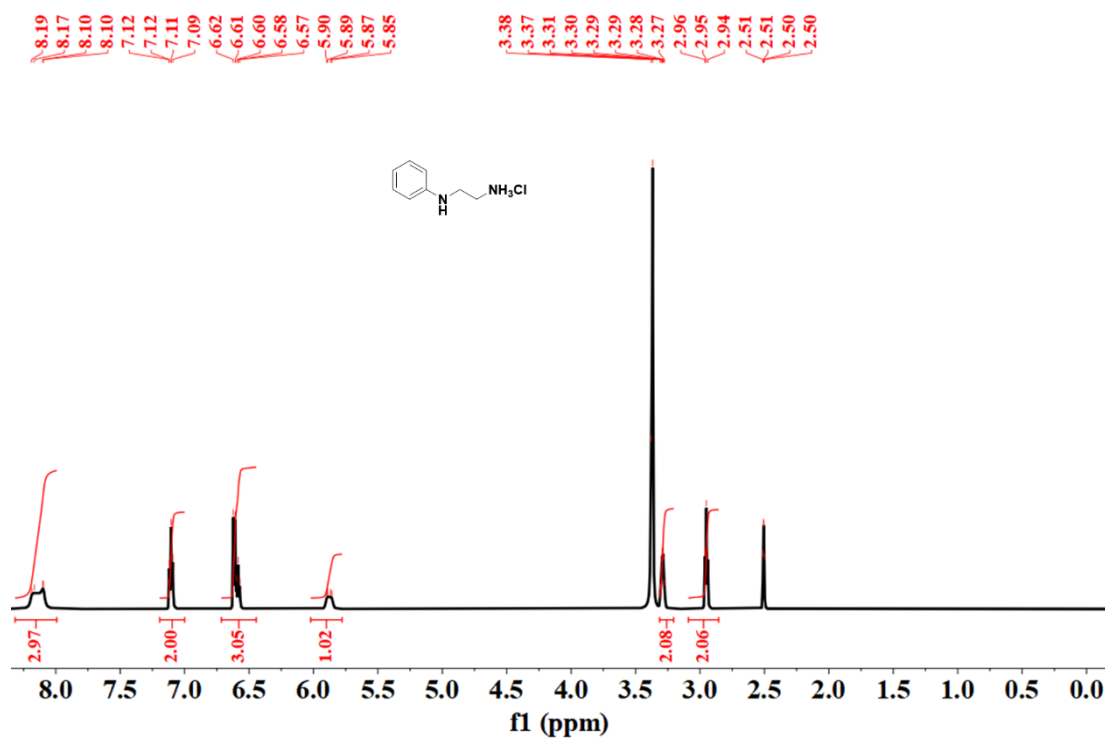

Figure S3. <sup>1</sup>H NMR spectrum of compound PNEACl.

## 5. DFT simulation

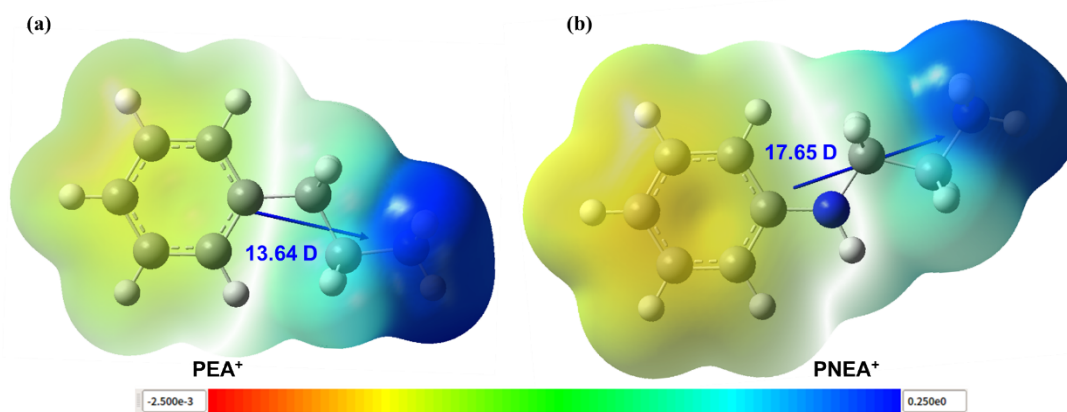

Figure S4. DFT 13.64 of (a) PEA<sup>+</sup> and (b) PNEA<sup>+</sup> using Gaussian 16 program.

## 6. Material Test

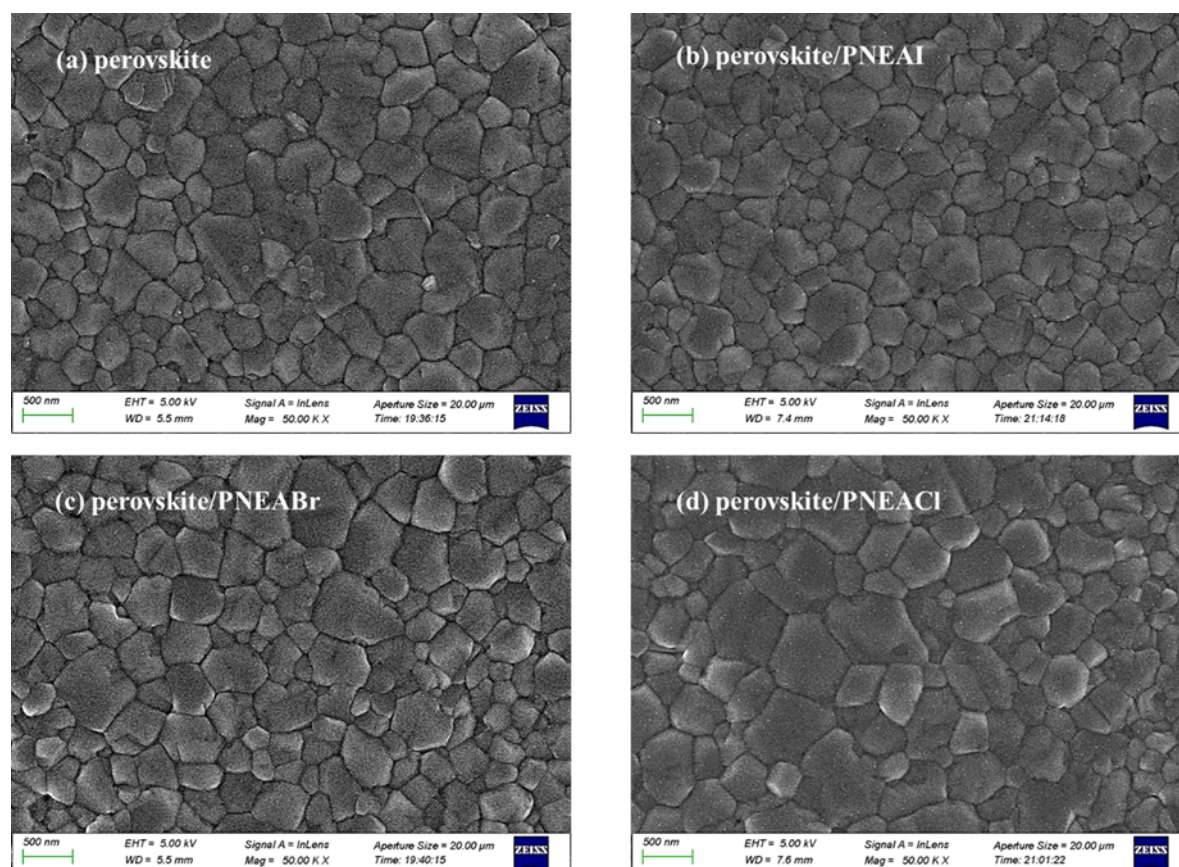

Figure S5. Top-view SEM images of (a) control (b) PNEAI-based (c) PNEABr-based and (d) PNEACl-based perovskite films.

## 7. Device Test

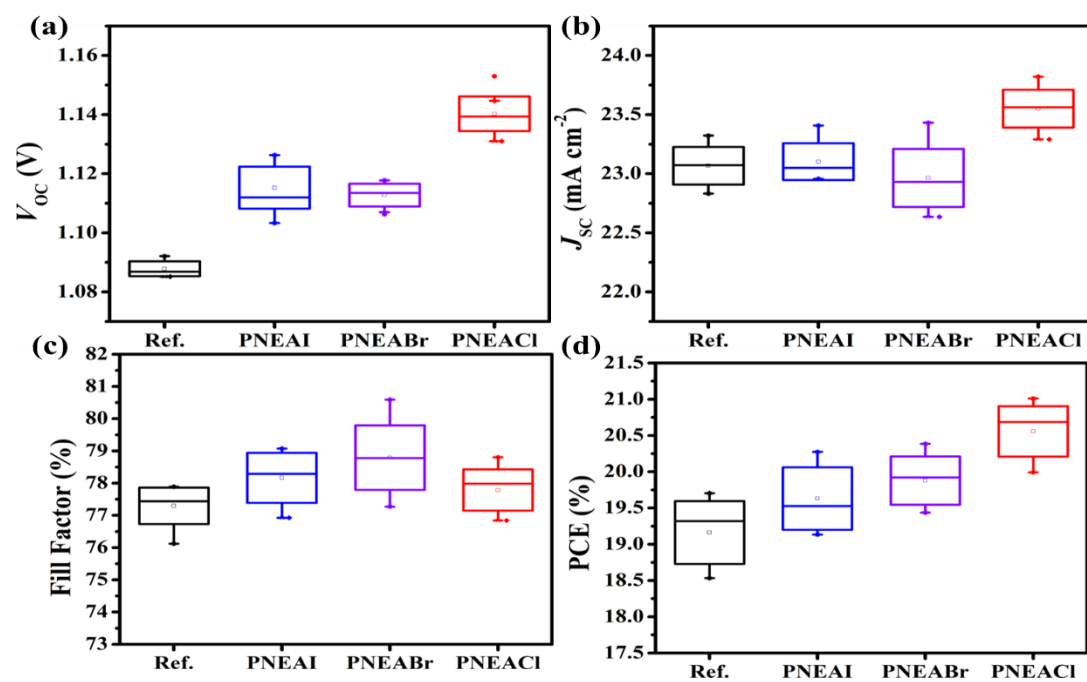

Figure S6. Box plots of (a) PCE, (b)  $V_{oc}$ , (c)  $J_{sc}$ , and (d) FF of corresponding devices.

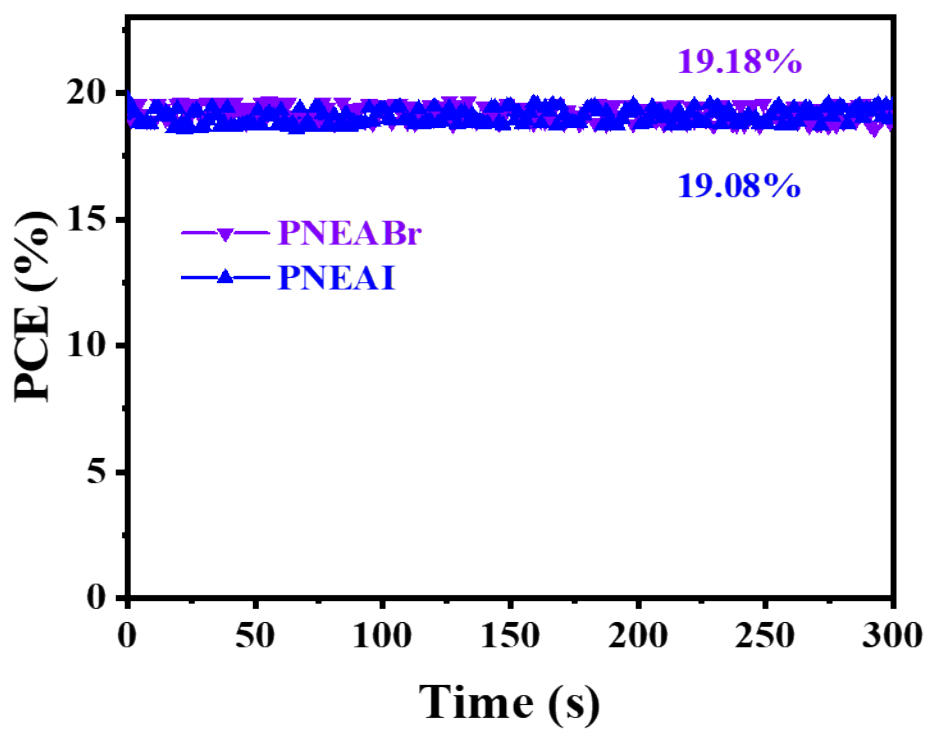

Figure S7. Stabilized power outputs for PNEABr and PNEAI devices.



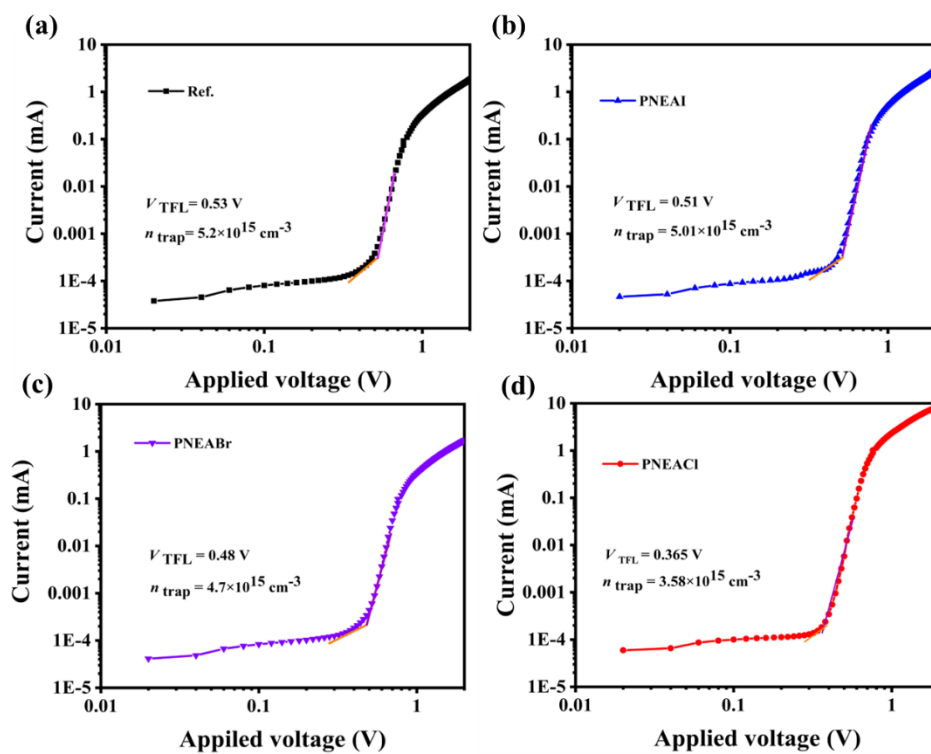

**Figure S8.** The SCLC curves of hole-only (ITO/PTAA/Perovskites/Au) devices: (a) control, (b) PNEAI-treated (c) PNEABr-treated, and (d) PNEAI-treated devices.

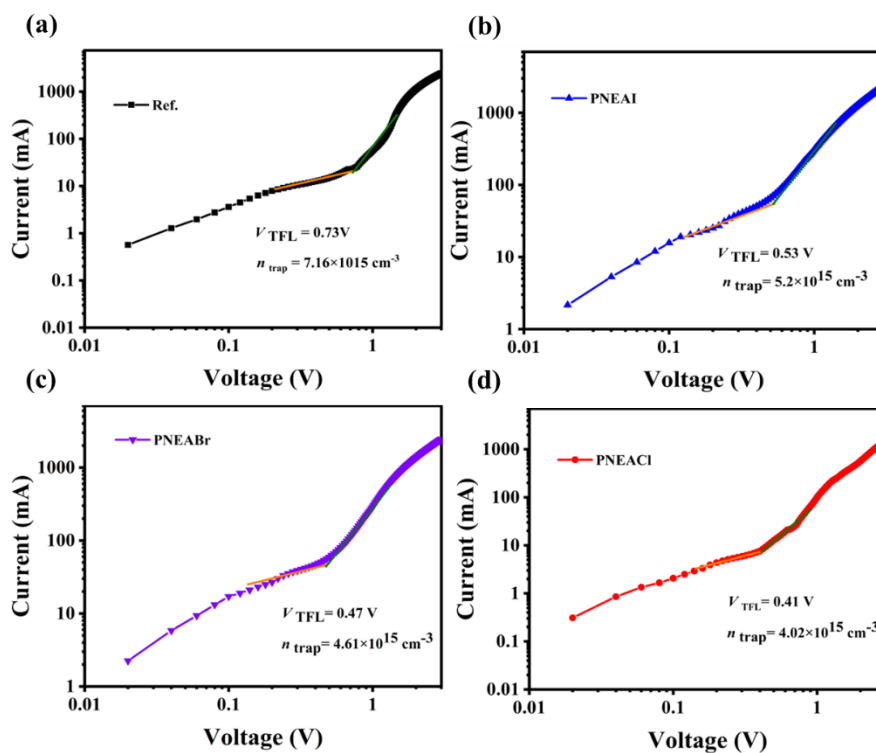

**Figure S9.** The curves of electron-only (ITO/C<sub>60</sub>/Perovskites/C<sub>60</sub>/Cu) devices: (a) control, (b) PNEAI-treated (c) PNEABr-treated, and (d) PNEAI-treated devices.

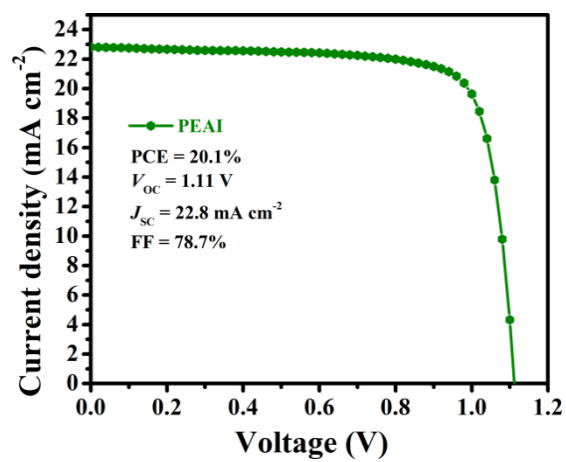

**Figure S10.**  $J$ - $V$  curves of PEAI-treated PSCs.

## 8. Concentration Optimization

**Table S1.** Devices PCE of perovskite without and with various PNEA halide concentration passivation

| Sample          |                 | $V_{oc}$ (V)    | $J_{sc}$ (mA/cm <sup>2</sup> ) | FF (%)           | PCE (%)          |
|-----------------|-----------------|-----------------|--------------------------------|------------------|------------------|
| <b>control</b>  |                 | $1.08 \pm 0.00$ | $22.79 \pm 0.48$               | $77.30 \pm 0.57$ | $19.16 \pm 0.43$ |
|                 |                 | (1.08)          | (23.32)                        | (77.70)          | (19.70)          |
| <b>W/PNEACl</b> | <b>0.5mg/ml</b> | $1.11 \pm 0.01$ | $22.98 \pm 0.28$               | $77.52 \pm 1.36$ | $19.83 \pm 0.28$ |
|                 |                 | (1.11)          | (23.32)                        | (77.38)          | (20.14)          |
|                 | <b>1mg/ml</b>   | $1.13 \pm 0.02$ | $23.55 \pm 0.16$               | $77.18 \pm 1.44$ | $20.55 \pm 0.35$ |
|                 |                 | (1.15)          | (23.31)                        | (78.10)          | (21.01)          |
|                 | <b>2mg/ml</b>   | $1.14 \pm 0.01$ | $21.93 \pm 0.56$               | $74.30 \pm 1.79$ | $18.57 \pm 0.48$ |
|                 |                 | (1.14)          | (22.94)                        | (75.42)          | (19.67)          |
| <b>W/PNEABr</b> | <b>0.1mg/ml</b> | $1.10 \pm 0.00$ | $22.27 \pm 0.46$               | $78.03 \pm 0.68$ | $19.20 \pm 0.17$ |
|                 |                 | (1.10)          | (22.77)                        | (78.05)          | (19.43)          |
|                 | <b>0.5mg/ml</b> | $1.11 \pm 0.00$ | $22.82 \pm 0.40$               | $78.39 \pm 1.39$ | $19.88 \pm 0.33$ |
|                 |                 | (1.12)          | (22.64)                        | (80.60)          | (20.39)          |
| <b>W/PNEAI</b>  | <b>0.1mg/ml</b> | $1.10 \pm 0.00$ | $23.40 \pm 0.13$               | $78.25 \pm 0.21$ | $20.07 \pm 0.13$ |
|                 |                 | (1.10)          | (23.57)                        | (78.07)          | (20.21)          |
|                 | <b>0.5mg/ml</b> | $1.12 \pm 0.00$ | $22.60 \pm 0.65$               | $77.96 \pm 1.25$ | $19.63 \pm 0.43$ |
|                 |                 | (1.12)          | (23.07)                        | (78.46)          | (20.27)          |
